# Supplementary material for: MiR-24 induces chemotherapy resistance and hypoxic advantage in breast cancer
Source: PubMed Central journal article supplement (PMC5386701; doi:10.18632/oncotarget.14470), 2017-01-03
Supplement: oncotarget-08-19507-s001.pdf [file oncotarget-08-19507-s001.pdf]

# MiR-24 induces chemotherapy resistance and hypoxic advantage in breast cancer

## SUPPLEMENTARY FIGURES

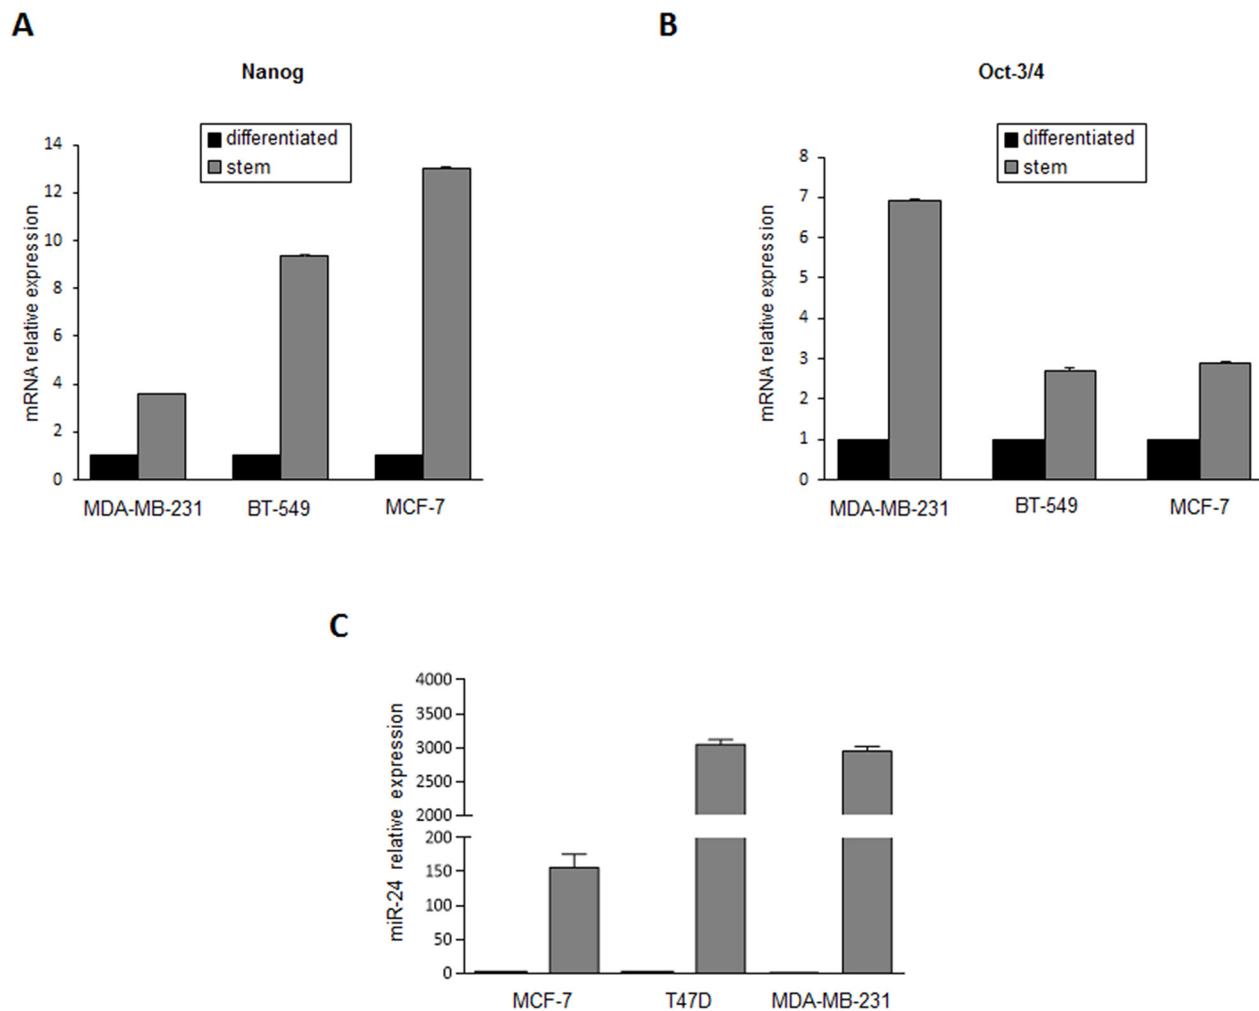

**Supplementary Figure 1: Expression of stem markers in MCF7 and MDA-MB-231 cells and of miR-24 after transfection.** Real time PCR showed the upregulation of *Nanog* and *Oct-3/4* in MDA-MB-231, BT-549 and MCF-7 mammospheres cultures compared to differentiated cells **A, B**. MiR-24 expression levels in MCF-7, T47D, and MDA-MB-231 cells after transfection **C**.

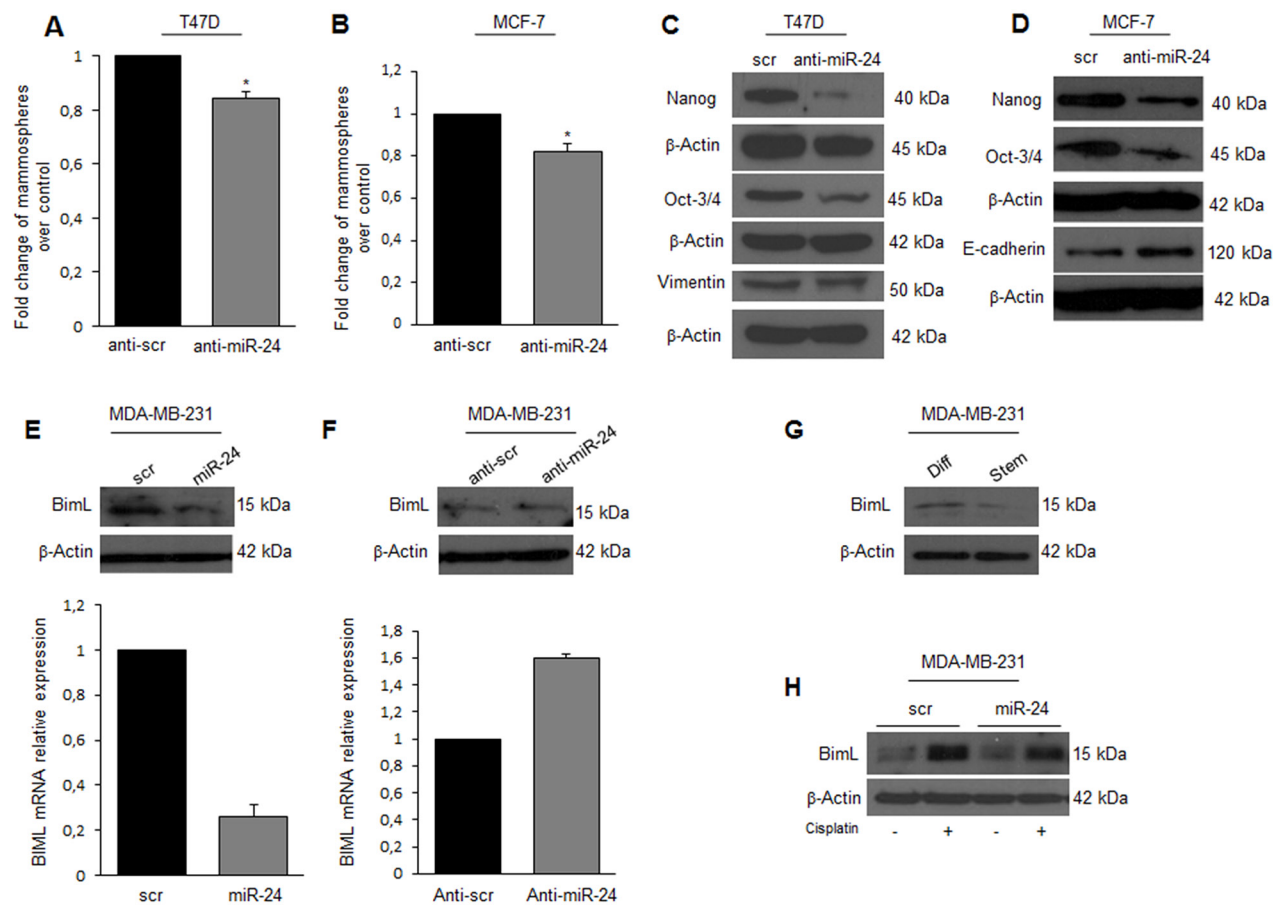

**Supplementary Figure 2: MiR-24 effects on breast cancer cells.** Anti-miR-24 transfection induced a 20% reduction of mammospheres in both T47D and MCF-7 **A, B**, and of stem cell markers **C, D**. MiR-24 downregulates BimL at mRNA and protein levels, as assessed by qRT-PCR and Western blotting in MDA-MB-231 **E**. On the other hand, anti-miR-24 increased in BimL expression **F**. Endogenous levels of BimL are higher in MDA-MB-231 differentiated cells compared to stem cells **G**. MiR-24 transfection reduced cisplatin effect on BimL levels **H**. Western blotting analyses are from representative experiments. Data are mean values  $\pm$  SD of two independent experiments. In **A, B**, significance was calculated using Student's t-test. \*,  $p < 0.05$ .

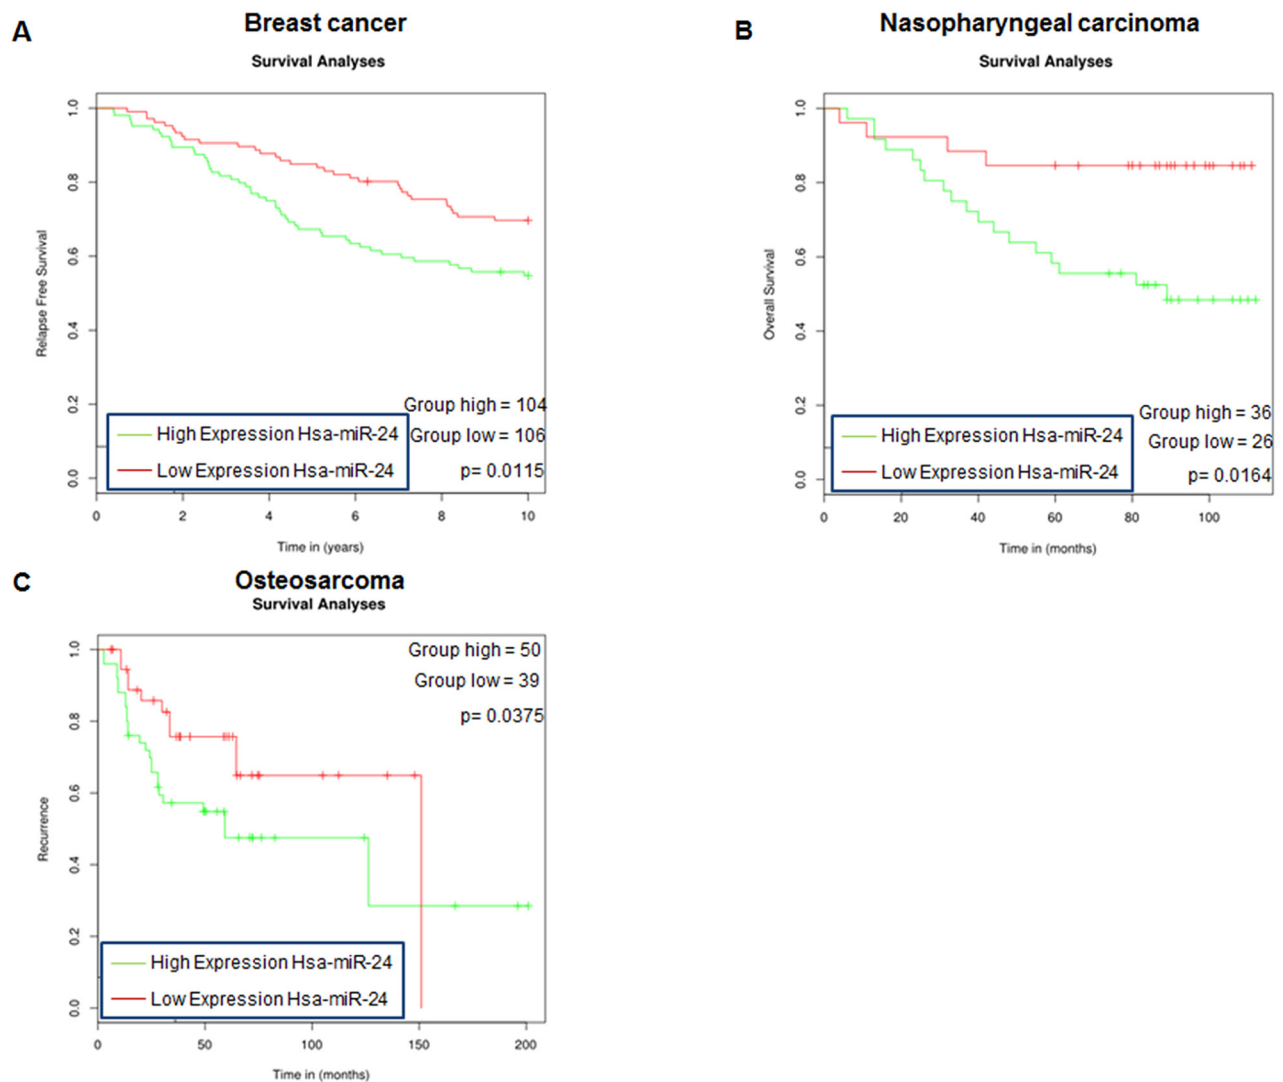

**Supplementary Figure 3: Survival correlation of miR-24 in several human cancer datasets.** **A.** GEO dataset Title “Analysis of early primary breast cancer to identify prognostic markers and associated pathways: mRNA and miRNA profiling”. **B.** GEO dataset Title “MicroRNA Signatures Correlate with Diagnosis, Distant Metastasis and Prognosis in nasopharyngeal carcinoma”. **C.** GEO dataset Title “microRNA- and mRNA-based studies in paraffin-archived human osteosarcoma specimens reveal profiles with reproducible and independent prognostic value”.

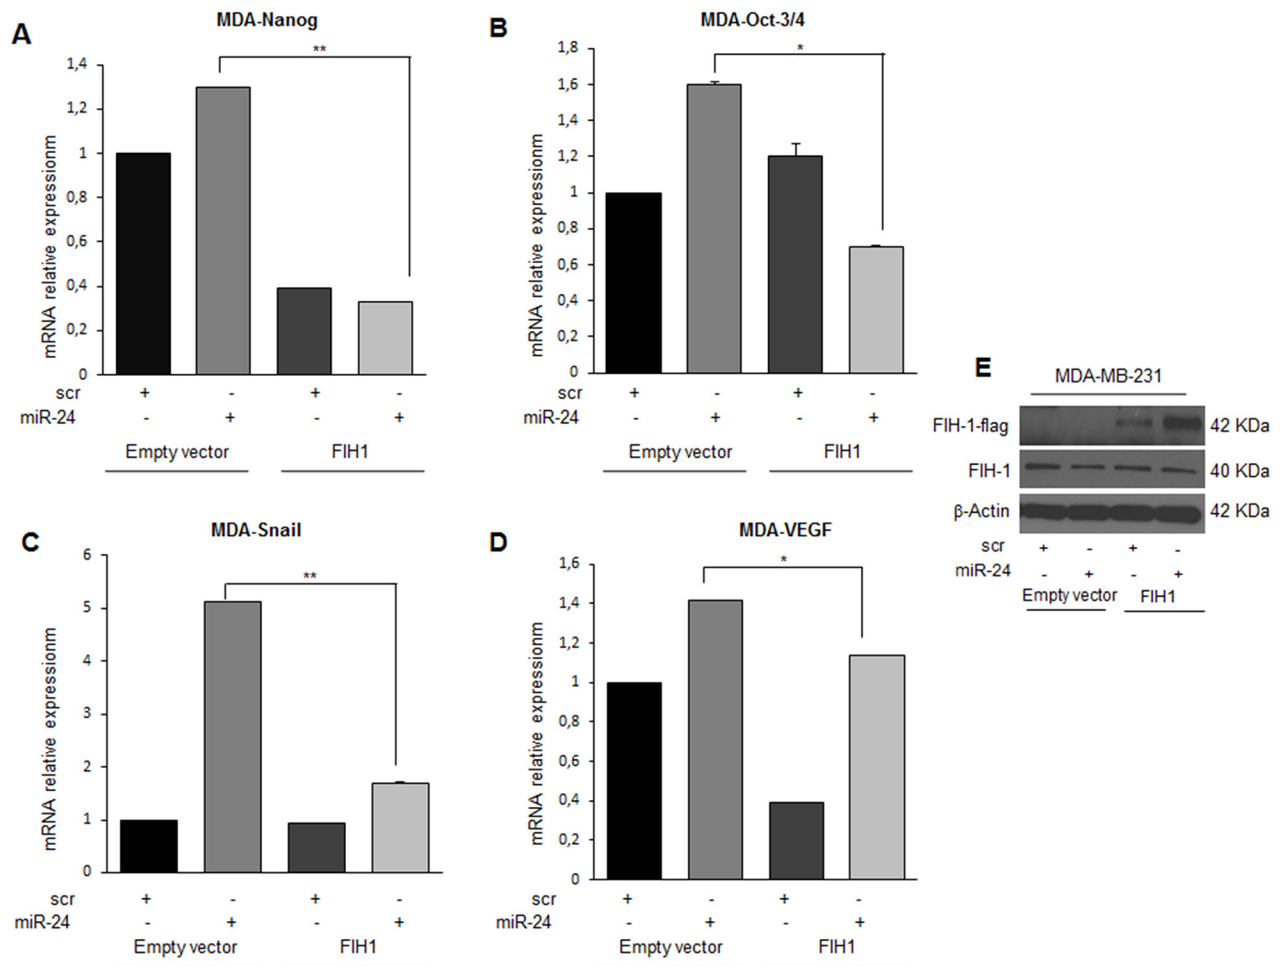

**Supplementary Figure 4: FIH1 reverts the effects of miR-24 on stem markers and on HIF1 $\alpha$  in MDA-MB-231.** FIH1 cDNA transfection in MDA-MB-231 cells abolished the effect of miR-24 on *Nanog* and *Oct-3/4* expression **A, B**. FIH1 also reverted the effect of the miR-24 on *Snail* and *VEGF* **C, D**. Western blot analysis of FIH1 expression in the rescue experiment in MDA-MB-231 cells upon hypoxia **E**. In **A, B, C,** and **D** data are mean values  $\pm$  SD from two independent experiments. Significance was calculated using Student's t-test. \*,  $p < 0.05$ ; \*\*,  $p < 0.01$ .
